# Diabetes Care

THE JOURNAL OF CLINICAL AND APPLIED RESEARCH AND EDUCATION

January 2014 Volume 37, Supplement 1

- S1 Professional Practice Committee
- S2 Introduction
- S4 Summary of Revisions to the 2014 Clinical Practice Recommendations
- S5 Executive Summary: Standards of Medical Care in Diabetes—2014

## Standards of Medical Care in Diabetes—2014

- S14 I. Classification and Diagnosis
  - A. Classification
  - B. Diagnosis of Diabetes
  - C. Categories of Increased Risk for Diabetes (Prediabetes)
- S16 II. Testing for Diabetes in Asymptomatic Patients
  - A. Testing for Type 2 Diabetes and Risk of Future Diabetes in Adults
  - B. Screening for Type 2 Diabetes in Children
  - C. Screening for Type 1 Diabetes
- S18 III. Detection and Diagnosis of Gestational Diabetes Mellitus
- S20 IV. Prevention/Delay of Type 2 Diabetes
- S21 V. Diabetes Care
  - A. Initial Evaluation
  - B. Management
  - C. Glycemic Control
  - D. Pharmacological and Overall Approaches to Treatment
  - E. Medical Nutrition Therapy
  - F. Diabetes Self-Management Education and Support
  - G. Physical Activity
  - H. Psychosocial Assessment and Care
  - I. When Treatment Goals Are Not Met
  - J. Intercurrent Illness
  - K. Hypoglycemia
  - L. Bariatric Surgery
  - M. Immunization
- S36 VI. Prevention and Management of Diabetes Complications
  - A. Cardiovascular Disease
  - B. Nephropathy
  - C. Retinopathy
  - D. Neuropathy
  - E. Foot Care
- S49 VII. Assessment of Common Comorbid Conditions
- S50 VIII. Diabetes Care in Specific Populations
  - A. Children and Adolescents
  - B. Preconception Care
  - C. Older Adults
  - D. Cystic Fibrosis–Related Diabetes
- S56 IX. Diabetes Care in Specific Settings
  - A. Diabetes Care in the Hospital
  - B. Diabetes and Employment
  - C. Diabetes and Driving
  - D. Diabetes Management in Correctional Institutions
- S61 X. Strategies for Improving Diabetes Care

- S81 Diagnosis and Classification of Diabetes Mellitus
- S91 Diabetes Care in the School and Day Care Setting
- S97 Diabetes and Driving
- S104 Diabetes Management in Correctional Institutions
- S112 Diabetes and Employment
- S118 Third-Party Reimbursement for Diabetes Care, Self-Management Education, and Supplies
- S120 Nutrition Therapy Recommendations for the Management of Adults With Diabetes

- S144 National Standards for Diabetes Self-Management Education and Support
- S154 Professional Practice Committee for the 2014 Clinical Practice Recommendations

### Diabetes Care Electronic Pages Available at [care.diabetesjournals.org](http://care.diabetesjournals.org)

- e1 Systematic Reviews
- e2 Consensus Reports
- e3 Position Statements
- e4 Scientific Statements

This issue is freely accessible online at [care.diabetesjournals.org](http://care.diabetesjournals.org).

Keep up with the latest information for *Diabetes Care* and other ADA titles via Facebook ([/ADAJournals](https://www.facebook.com/ADAJournals)) and Twitter ([@ADA\\_Journals](https://twitter.com/ADA_Journals)).
